# Supplementary material
Source: publisher site journal article supplement (https://www.dovepress.com/get_supplementary_file.php?f=429517.docx)
Supplement: Supplementary file 1 [file get_supplementary_file.php]

**Figure S1: Survey on Physician's Awareness of Pulmonary Rehabilitation**

Dear Colleagues:

We are conducting a survey on physicians’ awareness of pulmonary rehabilitation. The main purpose is to understand the extent of clinical physicians' knowledge and proficiency in pulmonary rehabilitation-related matters. The results of this survey are for research purposes only and will not impact your work in any way. Please fill it out truthfully, and thank you for your cooperation!

**Part One: Basic Information Data**

1. **Gender:** 🞏Male 🞏Female
2. **Age:** 🞏 Less than 25 years old 🞏25-40 years old 🞏40-50 years old 🞏50-60 years old 🞏60 years and older
3. Hospital Level：🞏 Tertiary Hospital 🞏 second-class hospital 🞏 Primary Hospital
4. Hospital Category: 🞏 General Hospital 🞏 Specialized Chest Disease Hospital 🞏 Other Specialized Hospital

**5.** Highest Education/Degree:： 🞏 Associate Degree 🞏 Bachelor's 🞏 Master's 🞏 Doctorate

**6.**  Professional Title: 🞏 Chief Physician 🞏 Associate Chief Physician 🞏 Attending Physician 🞏 Resident Physician 🞏 Assistant Physician 🞏 Not yet ranked/Medical Student

**7.** Position: 🞏 Department Head/Ward Head 🞏 Head of Treatment Team ☐ Physician

**8.** Specialization: 🞏 Respiratory Medicine 🞏 Medical Oncology 🞏 Thoracic Surgery 🞏 Surgical Oncology 🞏 Radiation Oncology 🞏 Traditional Chinese Medicine 🞏 Rehabilitation Medicine 🞏 ICU (Intensive Care Unit) 🞏 General/Internal Medicine🞏 Radiology (including X-ray, CT, MRI) 🞏 Other (please specify): _____

**9.** Years of Work in the Specialization：🞏 Less than 5 years 🞏5-10 years 🞏10-20 years 🞏20 or more years

**Part Two: Awareness of Pulmonary Rehabilitation (Respiratory Rehabilitation)**

1、Please rate your level of knowledge regarding pulmonary rehabilitation (respiratory rehabilitation) on a scale of 0 to 10, where 0 means you have no knowledge at all, and 10 means you have a very thorough understanding.

|  |  |  |  |  |  |  |  |  |  |  |
| --- | --- | --- | --- | --- | --- | --- | --- | --- | --- | --- |
| 0 | 1 | 2 | 3 | 4 | 5 | 6 | 7 | 8 | 9 | 10 |

2、Have you studied theoretical knowledge of pulmonary rehabilitation (respiratory rehabilitation)?

🞏 Yes 🞏 No 🞏 Uncertain

If yes, please select the learning methods (multiple choices are possible):

🞏 Self-study (reading materials, watching videos, etc.)

🞏 Hospital or community organized lectures and PowerPoint presentations

🞏 Participation in continuing medical education courses

🞏 Attendance at various academic conferences for learning

🞏 Completion of a six-month or longer advanced training program in a higher-level hospital for exposure to and understanding of relevant knowledge

🞏Received systematic learning and training at a PCCM (Pulmonary and Critical Care Medicine) rehabilitation specialization center or specialized rehabilitation institution.

🞏 Other (Please specify): _____

**Part Three: Understanding of Pulmonary Rehabilitation (Respiratory Rehabilitation)**

1. Correct descriptions of pulmonary rehabilitation (multiple choice):

🞏Pulmonary rehabilitation is a comprehensive intervention based on a thorough assessment of the patient.

🞏Pulmonary rehabilitation is based on comprehensive patient assessment, followed by precise treatment, including measures such as exercise, education, behavior change, nutritional intervention, and social-psychological support.

🞏Pulmonary rehabilitation aims to improve the physical and psychological condition of patients with chronic respiratory diseases and promote long-term maintenance of healthy behaviors.

2. Correct descriptions of the role of pulmonary rehabilitation (respiratory rehabilitation) (select all that apply):

| Reducing hospitalization rates and mortality | Correct | Incorrect | Uncertain |
| --- | --- | --- | --- |
| Limiting exercise capacity |  |  |  |
| Exacerbating respiratory distress and lower limb discomfort |  |  |  |
| Improving upper limb muscle strength and endurance |  |  |  |
| Enhancing quality of life |  |  |  |
| Limiting activity capacity (such as daily activities) |  |  |  |
| Regulating emotional function |  |  |  |
| Increasing self-care and cognition |  |  |  |
| Increasing self-management |  |  |  |
| Reducing physical activity levels |  |  |  |

3. Here are your statements about pulmonary rehabilitation:

|  | Correct | Incorrect | Uncertain |
| --- | --- | --- | --- |
| Patients undergoing pulmonary rehabilitation should receive a baseline assessment for comorbidities. |  |  |  |
| Exercise training is an important component of pulmonary function rehabilitation for patients with chronic obstructive pulmonary disease (COPD) undergoing lung surgery. |  |  |  |
| The effects of pulmonary rehabilitation last for some time, but they gradually decrease beyond 12-18 months. |  |  |  |
| Some benefits of pulmonary rehabilitation, such as health-related quality of life, continue beyond 12-18 months. |  |  |  |
| COPD patients should receive bronchodilator treatment before undergoing pulmonary rehabilitation. |  |  |  |
| Both interval and continuous training are safe and effective in pulmonary rehabilitation. |  |  |  |
| The optimal exercise frequency for pulmonary rehabilitation is five times a week, 30 minutes each time. |  |  |  |
| High-intensity lower limb exercise training produces greater physiological benefits than low-intensity training. |  |  |  |
| Both low-intensity and high-intensity exercise training have clinical benefits for COPD patients with lung surgery complications. |  |  |  |
| Incorporating strength training into pulmonary rehabilitation can increase muscle strength and muscle mass. |  |  |  |
| COPD patients should engage in both aerobic and resistance exercise in pulmonary rehabilitation. The combination of both improves endurance and function more than aerobic exercise alone. |  |  |  |
| Water-based training (such as swimming) is an effective alternative to land-based training. |  |  |  |
| Education is a component of pulmonary rehabilitation and should include information on collaborative self-management, preventing disease exacerbation, and more. |  |  |  |
| Preoperative pulmonary rehabilitation for lung surgery can help reduce perioperative complications. |  |  |  |

4. Regarding the content of pulmonary rehabilitation (respiratory rehabilitation), please select the option that best reflects your understanding:

|  | Haven't heard of it | Heard of it but don't understand | Understand, but not enough to introduce or promote to patients | Familiar, can provide a detailed introduction to patients, but not enough to guide | Very familiar, can guide patients in pulmonary rehabilitation |
| --- | --- | --- | --- | --- | --- |
| Exercise training |  |  |  |  |  |
| Respiratory muscle training |  |  |  |  |  |
| Home oxygen therapy |  |  |  |  |  |
| Health education |  |  |  |  |  |
| Traditional Chinese medicine rehabilitation |  |  |  |  |  |
| Remote medical rehabilitation (through the Internet of Things, apps, WeChat, etc.) |  |  |  |  |  |
| Neuromuscular electrical stimulation |  |  |  |  |  |
| Non-invasive ventilation |  |  |  |  |  |
| Self-management (adherence to medication, changing unhealthy living environments, dietary therapy, behavior change) |  |  |  |  |  |
| Psychological intervention |  |  |  |  |  |

5. Which conditions do you think are suitable for pulmonary rehabilitation (respiratory rehabilitation)? (Multiple choices allowed)

🞏Chronic obstructive pulmonary disease (COPD) 🞏Asthma 🞏Chronic bronchitis 🞏Pulmonary arterial hypertension/pulmonary heart disease 🞏 Interstitial lung disease 🞏Bronchiectasis 🞏Lung cancer 🞏Undergoing lung surgery 🞏cardiovascular diseases 🞏chronic kidney disease 🞏Chronic liver disease 🞏Other

6. How much benefit do you believe patients can derive from pulmonary rehabilitation (respiratory rehabilitation)? Rate on a scale of 0 (no benefit) to 10 (maximum benefit).

|  |  |  |  |  |  |  |  |  |  |  |
| --- | --- | --- | --- | --- | --- | --- | --- | --- | --- | --- |
| 0 | 1 | 2 | 3 | 4 | 5 | 6 | 7 | 8 | 9 | 10 |

**Part Four: Implementation of Pulmonary Rehabilitation (Respiratory Rehabilitation)**

1. Has your hospital (department) ever conducted pulmonary rehabilitation (respiratory rehabilitation) and related activities for patients?

🞏Yes 🞏No 🞏Unclear

If your answer is "Yes," to what extent has your hospital (department) implemented pulmonary rehabilitation (respiratory rehabilitation) and related activities for patients?

| 1 Only mentioned it to patients but not actually implemented |
| --- |
| 2 Implemented it, but not yet integrated into routine practice |
| 3 Integrated into routine practice, but the rehabilitation system is not well-established |
| 4 Integrated into routine practice, and a well-established rehabilitation system is in place |

If your answer is "Yes," does the pulmonary rehabilitation currently conducted in your hospital/department include:

🞏 Preoperative pulmonary rehabilitation 🞏 Postoperative pulmonary rehabilitation

2. Are you willing to provide pulmonary rehabilitation (respiratory rehabilitation) treatment to patients?

🞏Yes 🞏No

If your answer is "No," what are the obstacles that prevent you from providing pulmonary rehabilitation (respiratory rehabilitation) to patients?

🞏 Limited understanding and knowledge of pulmonary rehabilitation; I don't know how to implement it

🞏 Heavy clinical workload; even if I know pulmonary rehabilitation is beneficial, I don't have the time or energy to introduce it to patients

🞏 Whether patients undergo pulmonary rehabilitation is not my concern

🞏 Lack of specialized pulmonary rehabilitation techniques and equipment, which affects the implementation and introduction to patients

🞏 No dedicated pulmonary rehabilitation institution; I don't know where to refer patients

🞏Other______________
